# Supplementary material
Source: Springer Nature journal article supplement (https://www.springermedizin.de/resource/supplementary/13054_2012_1961_MOESM3_ESM.pdf/9711938)

Figure 3

$K_{iP}$   
( $10^{-3}/\text{min}$ )

Injurious Ventilation

Protective Ventilation

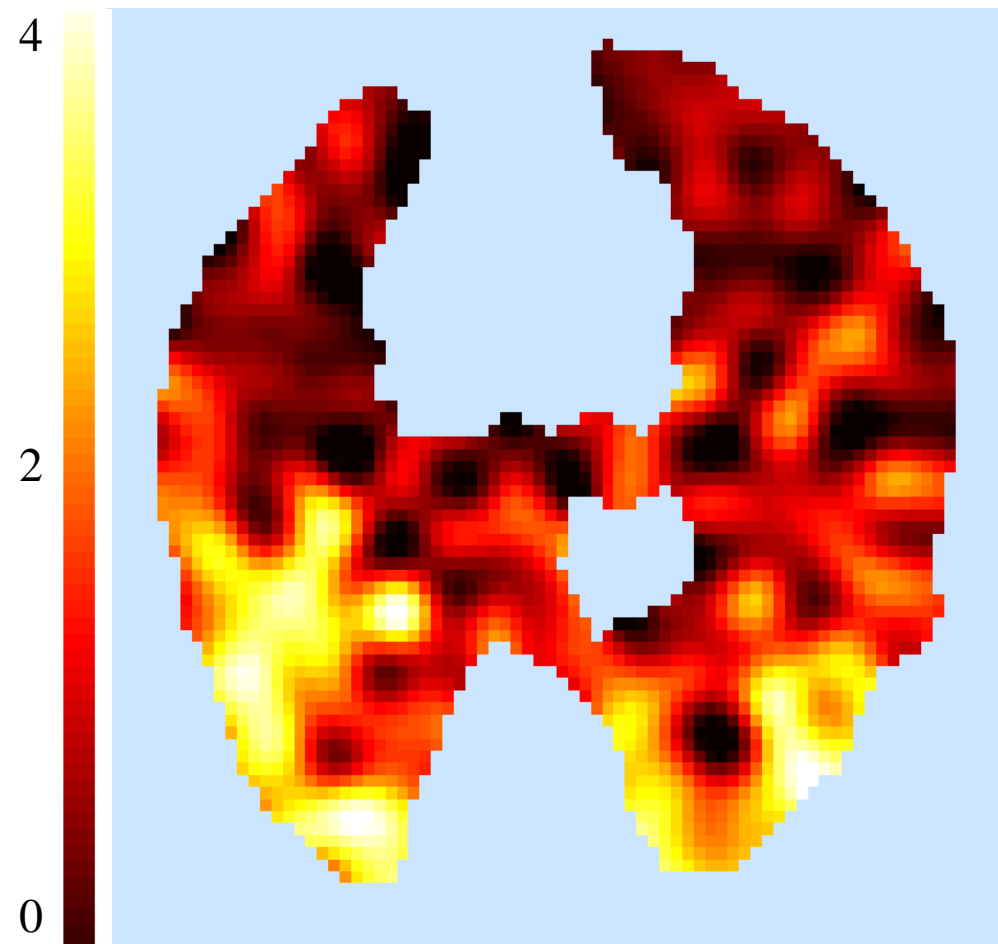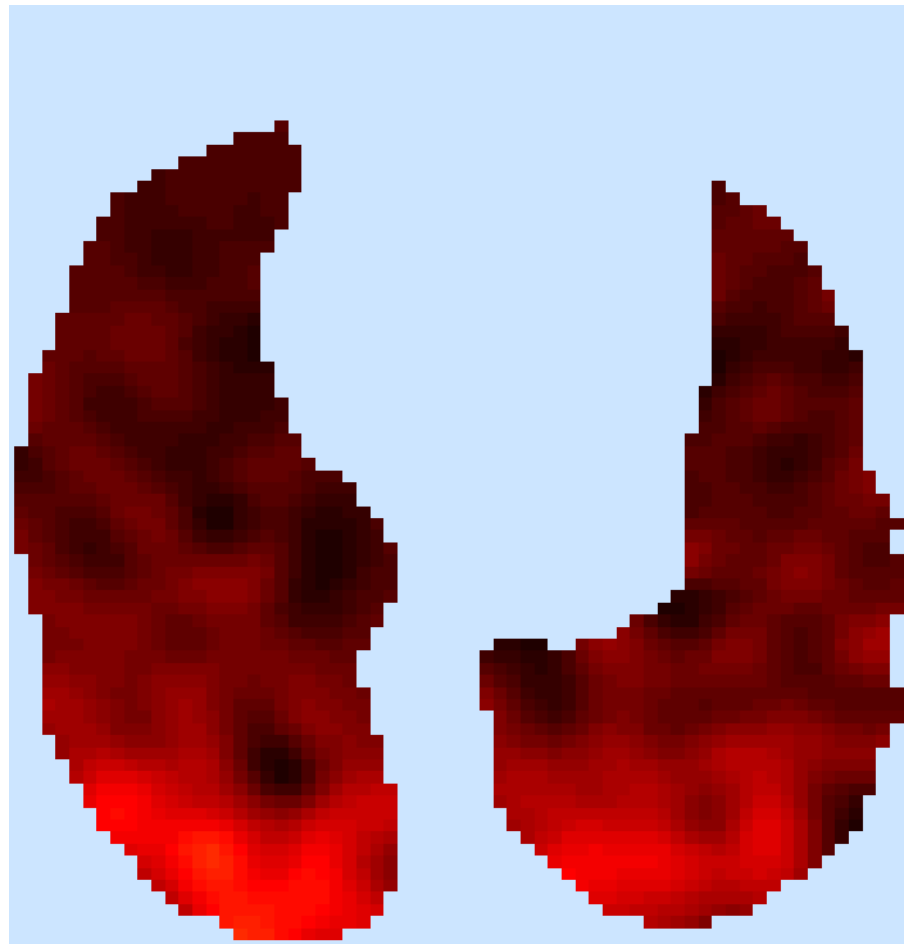

Supplement: MOESM3 [file 9711938]
